# Supplementary material for: The antitumor activity of CYB-L10, a human topoisomerase IB catalytic inhibitor
Source: PubMed Central journal article supplement (PMC6442119; doi:10.1080/14756366.2018.1516651), 2019-03-25
Supplement: IENZ_A_1516651_SM0316.pdf [file IENZ_A_1516651_SM0316.pdf]

## SUPPLEMENTARY DATA FOR

### The antitumor activity of CYB-L10, a human topoisomerase IB catalytic inhibitor

Qian Yu<sup>a</sup>, Yu Chen<sup>a</sup>, Hui Yang<sup>a</sup>, Hong-Li Zhang<sup>a</sup>, Keli Agama<sup>b</sup>, Yves Pommier<sup>b</sup>, Lin-Kun An<sup>a,\*</sup>

<sup>a</sup>School of Pharmaceutical Sciences, Sun Yat-sen University, Guangzhou, 510006, China;

<sup>b</sup>Developmental Therapeutics Branch and Laboratory of Molecular Pharmacology, Center for Cancer Research, National Cancer Institute, Bethesda, MD 20892-4255, United States

\*: Corresponding author: Lin-Kun An

Tel. and fax: +86-20-39943413

E-mail address: [lssalk@mail.sysu.edu.cn](mailto:lssalk@mail.sysu.edu.cn)

#### Content

|                                                         |    |
|---------------------------------------------------------|----|
| <b>Figure S1</b> (TOP2-mediated relaxation assay) ..... | S2 |
|---------------------------------------------------------|----|

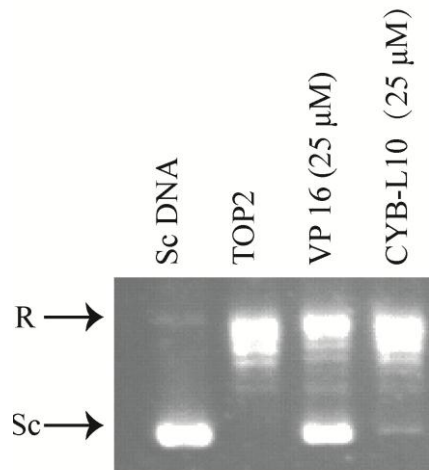

**Figure S1.** TOP2-mediated relaxation assay. Lane 1, supercoiled pBR322 DNA alone; Lane 2, DNA and enzyme; Lanes 3, DNA, enzyme and the positive control etoposide (VP16) at 25  $\mu$ M; Lanes 4, DNA, enzyme and CYB-L10 at 25  $\mu$ M. R: relaxed DNA. Sc: supercoiled DNA.
